# Supplementary material for: Genetic Interactions Between Brassinosteroid-Inactivating P450s and Photomorphogenic Photoreceptors in Arabidopsis thaliana
Source: PubMed Central journal article supplement (PMC3516480; doi:10.1534/g3.112.004580), 2012-12-01
Supplement: supp_2.12.1585_FigureS1.pdf [file supp_2.12.1585_FigureS1.pdf]

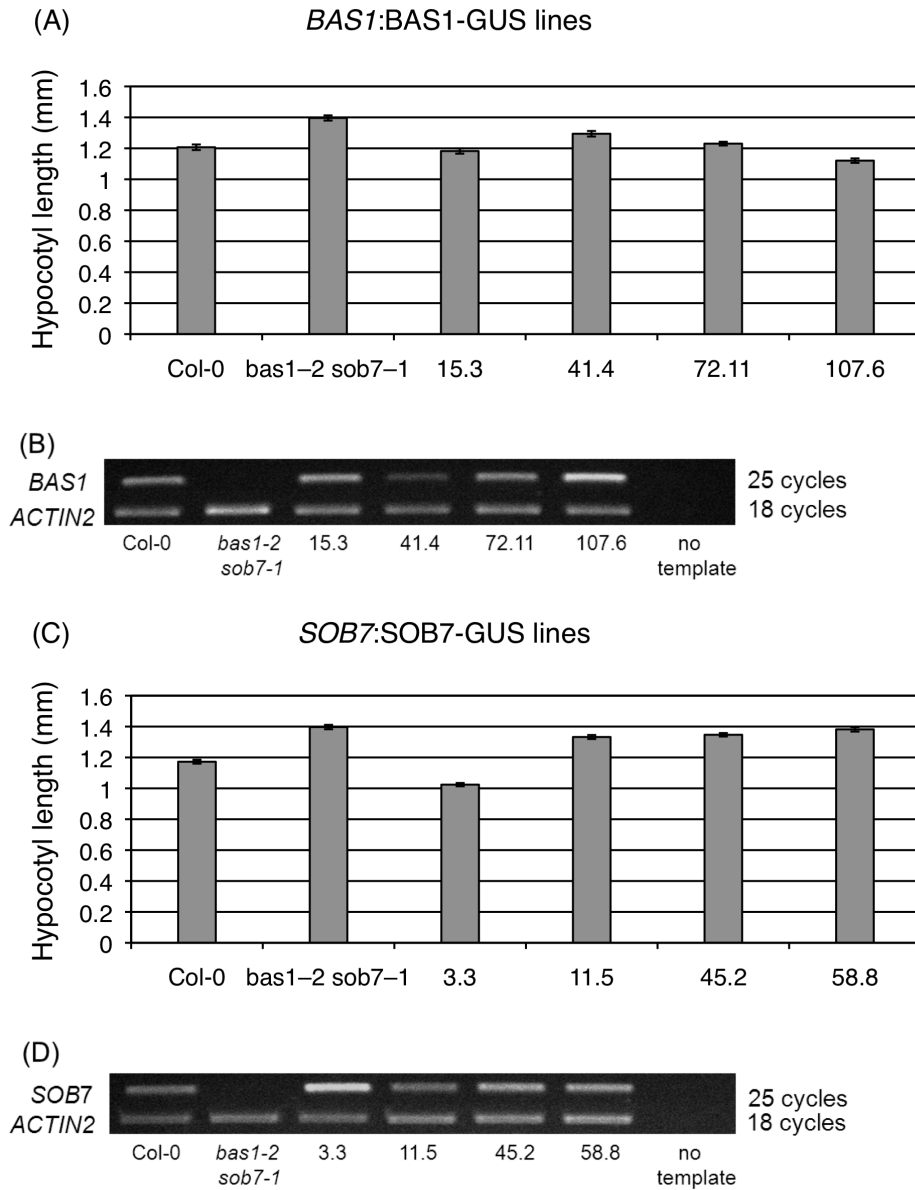

**Figure S1** Genetic and molecular analysis of *BAS1*:*BAS1*-GUS and *SOB7*:*SOB7*-GUS lines. Genetic and molecular analysis of transgenic plants expressing *BAS1*:*BAS1*-GUS (A and B) and *SOB7*:*SOB7*-GUS (C and D) in *bas1-2 sob7-1* background. Seedlings were grown in  $45 \mu\text{mol m}^{-2} \text{sec}^{-1}$  of white light for four days before being digitized and measured. For transcript analysis total RNA was isolated from four-day-old seedlings grown in similar conditions as used for hypocotyl growth analysis.
